# Supplementary material for: Producing shape-engineered alginate particles using viscoplastic fluids
Source: Royal Society of Chemistry journal article supplement (doi:10.1039/d2sm00621a), 2022-01-01
Supplement: d2sm00621a1.pdf [file d2sm00621a1.pdf]

## Electronic Supplementary Information for

### Producing Shape-Engineered Alginate Particles Using Viscoplastic Fluids

Sima Asadi,<sup>a</sup> Arif Z. Nelson,<sup>b‡</sup> and Patrick S. Doyle<sup>\*abc</sup>

<sup>a</sup> *Department of Chemical Engineering, Massachusetts Institute of Technology, Cambridge, MA 02139, USA. E-mail: pdoyle@mit.edu*

<sup>b</sup> *Critical Analytics for Manufacturing Personalized-Medicine, Singapore-MIT Alliance for Research and Technology, Singapore 138602, Singapore.*

<sup>c</sup> *Harvard Medical School Initiative for RNA Medicine, Boston, MA 02215, USA.*

<sup>‡</sup> *Present address: Food, Chemical and Biotechnology Cluster, Singapore Institute of Technology, Singapore 138683, Singapore.*

This pdf file includes Figure S1, Figure S2, Figure S3, and the captions for Movies S1 to S4. Movies S1 to S4 have been provided separately as mp4 files.

### Droplet diameter calculation:

We used 4 different methods to calculate the diameter of viscoplastic droplets dripped from a 14G vertical nozzle:

1. Dripping time of  $n = 10$  droplets,  $t$ , was used to calculate  $D_M = (6Q_0t/(n\pi))^{1/3}$ , where  $Q_0$  is the fluid flow rate set by a syringe pump.
2. Projected area of the droplet obtained from its 2D image,  $A$ , was used to calculate  $D_A = (4A/\pi)^{1/2}$ .
3. Volume of the droplet was used to calculate  $D_V = (6V/\pi)^{1/3}$ . Assuming rotational symmetry, we calculated  $V = \int_0^L \pi x^2 dy$ , where  $L$  and  $x = f(y)$  are the droplet length and radius, respectively.  $f(y)$  was obtained by fitting a 6<sup>th</sup> degree polynomial curve to the semi-perimeter of the droplet in its 2D image.
4. Similar to method 3, volume of the droplet was used to calculate  $D_C = (6V_C/\pi)^{1/3}$ . We used the length of droplet centerline in the 2D image,  $L_C$ , and its distance from the droplet edge,  $x_C = f(y)$ , and calculated  $V_C = \int_0^{L_C} \pi x_C^2 dy$ .

The results of all methods have been shown in Fig. S1.

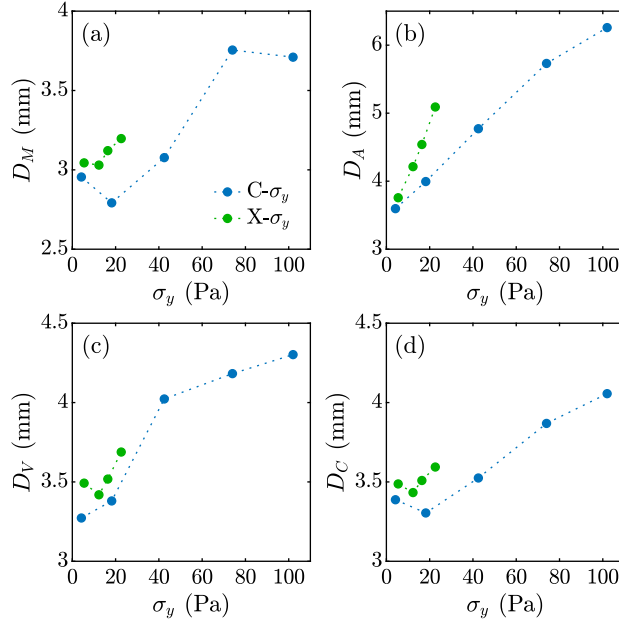

**Figure S1:** Diameter of C- $\sigma_y$  and X- $\sigma_y$  droplets dripped from a 14G vertical nozzle. (a)  $D_M$ , (b)  $D_A$ , (c)  $D_V$ , and (d)  $D_C$  have been defined above. Each data point in (b), (c), and (d) is the average of 3 trials and the error bars (not shown) are smaller than the marker size. Dotted lines are used as a guide for the eyes.

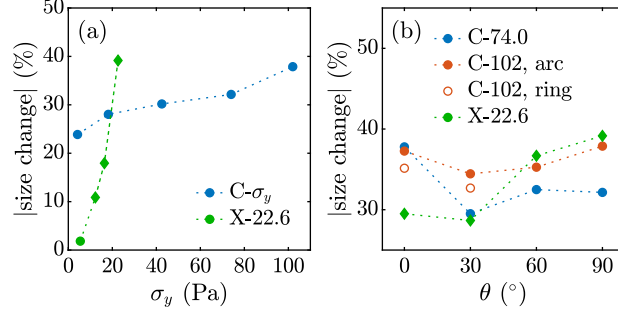

**Figure S2:** Effect of (a)  $\sigma_y$  and (b)  $\theta$  on the degree of shrinkage and swelling of C- $\sigma_y$  and X- $\sigma_y$  particles compared to the droplets. Circle markers show negative values (shrinkage) and the diamond markers show positive values (swelling). Each data point is the average of 3 trials and the error bars (not shown) are smaller than the marker size. Dotted lines are used as a guide for the eyes.

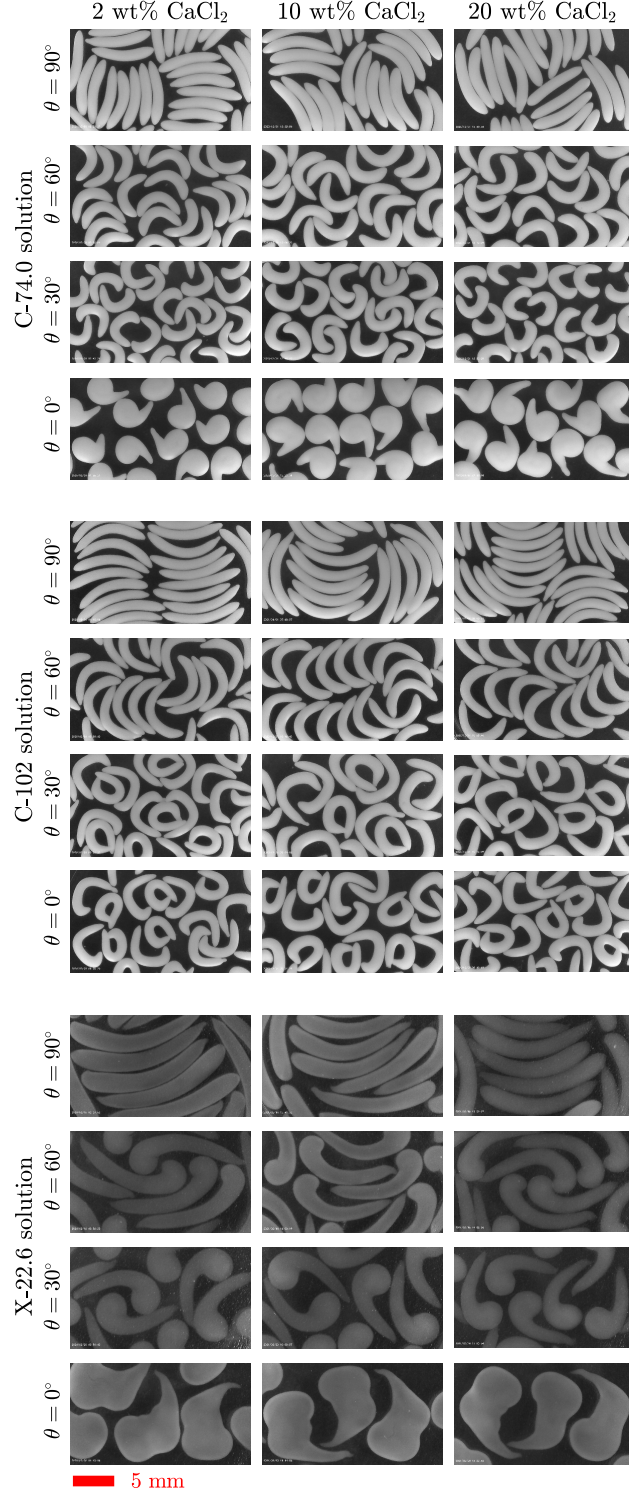

**Figure S3:** Effect of  $\text{CaCl}_2$  concentration on the shape of alginate particles. Cumulative images of all particles produced using C-74.0, C-102, and X-22.6 solutions dripped from a 14G nozzle positioned at  $\theta = 90^\circ$ ,  $\theta = 60^\circ$ ,  $\theta = 30^\circ$ , or  $\theta = 0^\circ$  into a 2, 10, or 20 wt%  $\text{CaCl}_2$  bath. The red scale bar is 5 mm for all images.

**Movie S1:** C- $\sigma_y$  solutions are dripped from a vertical 14G nozzle into a 2 wt% CaCl<sub>2</sub> bath. The red scale bar is 5 mm for all videos.

**Movie S2:** C-74.0 and C-102 solutions are dripped from a 14G nozzle angled at  $\theta = 60^\circ$ ,  $\theta = 30^\circ$ , or  $\theta = 0^\circ$  into a 2 wt% CaCl<sub>2</sub> bath. The red scale bar is 5 mm for all videos.

**Movie S3:** X- $\sigma_y$  solutions are dripped from a vertical 14G nozzle into a 2 wt% CaCl<sub>2</sub> bath. The red scale bar is 5 mm for all videos.

**Movie S4.** X-22.6 solution is dripped from a 14G nozzle angled at  $\theta = 60^\circ$ ,  $\theta = 30^\circ$ , or  $\theta = 0^\circ$  into a 2 wt% CaCl<sub>2</sub> bath. The red scale bar is 5 mm for all videos.
